# Supplementary material
Source: ML conference proceedings conference paper supplement (https://proceedings.mlr.press/v84/pati18a.html)
Supplement: Supplementary file [file pati18a-supp.pdf]

# Supplemental document On Statistical Optimality of Variational Bayes

**Debdeep Pati**  
Texas A&M University

**Anirban Bhattacharya**  
Texas A&M University

**Yun Yang**  
Florida State University

## 1 Proofs of results in the main document

### 1.1 Convention

Equations in the main document are cited as (1), (2) etc., retaining their numbers, while new equations defined in this document are numbered (S1), (S2) etc.

### 1.2 Proof of Theorem 3.1

As in the proof sketch in the main document, our first step is to show that under the testing assumption **T**,

$$\int_{\Theta} \xi(\theta, \theta^*) p_{\theta}(d\theta) \leq e^{Cn\varepsilon_n^{\kappa}}, \quad (1)$$

w.h.p. (w.r.t.  $\mathbb{P}_{\theta^*}^{(n)}$ ), where recall  $\log \xi(\theta, \theta^*) = \ell_n(\theta, \theta^*) + nd^{\kappa}(\theta, \theta^*)$ . We first establish (1). Define

$$T_1 = \int_{d(\theta, \theta^*) \leq \varepsilon_n} \xi(\theta, \theta^*) p_{\theta}(d\theta),$$

$$T_2 = \int_{d(\theta, \theta^*) > \varepsilon_n} \xi(\theta, \theta^*) p_{\theta}(d\theta).$$

Let us first tackle  $T_1$ . Since  $\mathbb{E}_{\theta^*}[e^{\ell_n(\theta, \theta^*)}] = 1$ , we have,

$$\mathbb{E}_{\theta^*} T_1 = \int_{d(\theta, \theta^*) \leq \varepsilon_n} e^{nd^{\kappa}(\theta, \theta^*)} p_{\theta}(d\theta) \leq e^{n\varepsilon_n^{\kappa}}.$$

Hence, by Markov's inequality,  $T_1 \leq e^{Cn\varepsilon_n^{\kappa}}$  with probability at least  $1 - e^{-Cn\varepsilon_n^{\kappa}}$ .

Let us now focus on  $T_2$ . Write  $T_2 = T_{21} + T_{22}$ , where

$$T_{21} = \int_{d(\theta, \theta^*) > \varepsilon_n} (1 - \phi_n) \xi(\theta, \theta^*) p_{\theta}(d\theta),$$

$$T_{22} = \int_{d(\theta, \theta^*) > \varepsilon_n} \phi_n \xi(\theta, \theta^*) p_{\theta}(d\theta),$$

where  $\phi_n$  is the test function from Assumption **T**. Focus on  $T_{21}$  first. Observe

$$\begin{aligned} \mathbb{E}_{\theta^*} T_{21} &= \int_{d(\theta, \theta^*) > \varepsilon_n} \mathbb{E}_{\theta} [1 - \phi_n] e^{nd^{\kappa}(\theta, \theta^*)} p_{\theta}(d\theta) \\ &\leq e^{-Cn\varepsilon_n^{\kappa}}. \end{aligned}$$

This implies, by Markov's inequality, that  $T_{21} \leq e^{-Cn\varepsilon_n^{\kappa}}$  with probability at least  $1 - e^{-Cn\varepsilon_n^{\kappa}}$ .

Finally, focus on  $T_{22}$ . Since  $\mathbb{E}_{\theta^*}[\phi_n] \leq e^{-n\varepsilon_n^{\kappa}}$ , it follows from Markov's inequality that  $\phi_n \leq e^{-Cn\varepsilon_n^{\kappa}}$  with probability at least  $1 - e^{-Cn\varepsilon_n^{\kappa}}$ . Hence,  $T_{22} \leq e^{-Cn\varepsilon_n^{\kappa}} T_2$  w.h.p. Adding the w.h.p. bound for  $T_{21}$ , we obtain, w.h.p.,

$$T_2 \leq e^{-Cn\varepsilon_n^{\kappa}} T_2 + e^{-Cn\varepsilon_n^{\kappa}}.$$

Rearranging,  $T_2 \leq e^{-Cn\varepsilon_n^{\kappa}}$  with probability at least  $1 - e^{-Cn\varepsilon_n^{\kappa}}$ . Combining with the bound for  $T_1$ , (1) is established.

Once (1) is established, the next step is to link the integrand in (1) with the latent variables. To that end, observe that

$$\xi(\theta, \theta^*) = \sum_{s^n} \exp\{h(\theta, s^n)\} \widehat{q}_{S^n}(s^n),$$

where

$$h(\theta, s^n) = \log \frac{p(Y^n | \mu, s^n) \pi_{s^n}}{p(Y^n | \theta^*) \widehat{q}_{S^n}(s^n)} + nd^{\kappa}(\theta, \theta^*).$$

Combining the above with (10), we have, w.h.p.,

$$\int_{\Theta} \sum_{s^n} \exp\{h(\theta, s^n)\} \widehat{q}_{S^n}(s^n) p_{\theta}(d\theta) \leq e^{Cn\varepsilon_n^{\kappa}}. \quad (2)$$

Next, use a well-known variational/dual representation of the KL divergence (see, e.g., Corollary 4.15 of [1]) which states that for any probability measure  $\mu$  and any measurable function  $h$  with  $e^h \in L_1(\mu)$ ,

$$\log \int e^{h(\eta)} \mu(d\eta) = \sup_{\rho} \left[ \int h(\eta) \rho(d\eta) - D(\rho || \mu) \right], \quad (3)$$

where the supremum is over all probability measures  $\rho \ll \mu$ . In the present context, setting  $\eta = (\theta, s^n)$ ,  $\mu := \widehat{q}_{S^n} \otimes p_{\theta}$ , and  $\rho = \widehat{q}_{\theta} \otimes \widehat{q}_{S^n}$ , it follows from the variational lemma (3) and some rearrangement of terms that w.h.p.

$$n \int_{\Theta} d^{\kappa}(\theta, \theta^*) \widehat{q}_{\theta}(d\theta) \leq n\varepsilon_n^{\kappa} + D(\widehat{q}_{\theta} || p_{\theta}) - \int_{\Theta} \sum_{s^n} h(\theta, s^n) \widehat{q}_{\theta}(d\theta).$$

From (7)–(9) (in the main document), it follows that the right hand side of the above display equals

$n\varepsilon_n^\kappa + \Omega(\hat{q}_\theta, \hat{q}_{S^n})$ . The proof of the theorem then follows, since by definition,  $\Omega(\hat{q}_\theta, \hat{q}_{S^n}) \leq \Omega(q_\theta, q_{S^n})$  for any  $(q_\theta, q_{S^n})$  in the variational family  $\Gamma$ .

### 1.3 Proof of Lemma 4.3

Since  $W_1(P^*, P) < \varepsilon$ , there exists a coupling  $q$  such that  $\sum_{k,k'} q_{kk'} \|\mu_k^* - \mu_{k'}\| < \varepsilon$ . Then  $\sum_k \pi_k^* \inf_{k'} \|\mu_k^* - \mu_{k'}\| < \varepsilon$ . Since  $\pi_k^* \geq \delta$ , we have  $\inf_{k'} \|\mu_k^* - \mu_{k'}\| \leq \varepsilon/\delta$  for all  $k = 1, \dots, K$ . This means for any  $k$ , there exists a  $k'$  such that  $\|\mu_k^* - \mu_{k'}\| < \varepsilon/\delta$ . Without loss of generality, let  $k' = k$ . This proves the first part of the assertion. To prove the second part, observe that for  $k \neq k'$ ,  $\|\mu_k^* - \mu_{k'}\| \geq \zeta - \|\mu_{k'}^* - \mu_{k'}\| \geq \kappa - \varepsilon/\delta$ . Then

$$\begin{aligned} \varepsilon > W_1(P^*, P) &\geq \inf_q \sum_{k \neq k'} q_{kk'} \|\mu_k^* - \mu_{k'}\| \\ &\geq (\zeta - \varepsilon/\delta) \inf_{C \in \mathcal{C}_{XY}} \mathbb{P}(X \neq Y) \\ &= (\zeta - \varepsilon/\delta) \sum_{k=1}^K |\pi_k^* - \pi_k|, \end{aligned}$$

implying  $\sum_{k=1}^K |\pi_k^* - \pi_k| \leq \varepsilon/(\zeta - \varepsilon/\delta)$ .

### 1.4 Proof of Theorem 4.2

We first ensure the existence of the test functions  $\Phi_n$ , and  $\Psi_n$  as described in (20)-(23). First, we find the covering numbers  $N(\varepsilon, \mathcal{P}, W_1)$  and  $N(\varepsilon, \mathcal{F}, h)$  to upper bound the Type I and II errors of the test functions  $\Phi_n$  and  $\Psi_n$ . Note that

$$\begin{aligned} h^2[f(\cdot | P_1) || f(\cdot | P_2)] &\leq \sum_{k=1}^K |\pi_{1,k} - \pi_{2,k}| + \\ &\quad \sum_{k=1}^k \pi_{1,k} \|\mu_{1,k} - \mu_{2,k}\|. \end{aligned}$$

Hence  $N(\varepsilon, \mathcal{F}, h) \leq N(\varepsilon^2/2, \mathcal{S}^{K-1}, \|\cdot\|_1) \times \{N(\varepsilon^2/2, C_\mu, \|\cdot\|)\}^K$  where  $\|\cdot\|_1$  denotes the  $L_1$  norm between two probability vectors and  $\|\cdot\|$  denotes the Euclidean norm. From Lemma A.4 of [2], we obtain  $N(\varepsilon^2/2, \mathcal{S}^{K-1}, \|\cdot\|_1) \leq (10/\varepsilon^2)^{K-1}$ . Also,  $\{N(\varepsilon^2/2, C_\mu, \|\cdot\|)\} \leq (2C_U/\varepsilon^2)^d$  for a global constant  $C_U$  is the diameter of the set  $C_\mu$ . Then  $N(\varepsilon, \mathcal{F}, h) \leq (C/\varepsilon^2)^{dK}$  for some constant  $C > 0$ . To obtain an upper bound for  $N(\varepsilon, \mathcal{P}, W_1)$ , we note that

$$\begin{aligned} W_1(P_1, P_2) &\leq \sum_{k=1}^K \max\{\pi_{1,k}, \pi_{2,k}\} \|\mu_{1,k} - \mu_{2,k}\| \\ &\quad + C_U \sum_{k=1}^K |\pi_{1,k} - \pi_{2,k}|. \end{aligned}$$

Hence  $N(\varepsilon, \mathcal{P}, W_1) \leq N(\varepsilon/(2C_U), \mathcal{S}^{K-1}, \|\cdot\|_1) \times \{N(\varepsilon/(2K), C_\mu, \|\cdot\|)\}^K \leq (CK/\varepsilon)^{dK} (10/\varepsilon)^{K-1}$ .

Hence  $\log N(\varepsilon, \mathcal{F}, h) \lesssim dK \log(1/\varepsilon)$  and  $\log N(\varepsilon, \mathcal{P}, W_1) \lesssim dK \log(K/\varepsilon)$ . Then, we have from (20)-(21)

$$\mathbb{E}_{P^*} \Phi_n \leq e^{-C_1 n \varepsilon^2 + dK \log(1/\varepsilon)} \quad (4)$$

$$\mathbb{E}_P [1 - \Phi_n] \leq e^{-C_2 n h^2 [f(\cdot | P) || f(\cdot | P^*)]}, \quad (5)$$

for any  $P$  with  $h[f(\cdot | P) || f(\cdot | P^*)] > \varepsilon$ . In this case, we choose  $\varepsilon \equiv \varepsilon_n$  to be as constant multiple of  $\{(dK/n) \log n\}^{1/2}$ . Also, we have from (22)-(23)

$$\mathbb{E}_{P^*} \Psi_n \leq e^{-C_1 n \varepsilon^2 + dK \log(K/\varepsilon)} \quad (6)$$

$$\mathbb{E}_P [1 - \Psi_n] \leq e^{-C_2 n W_1^2(P, P^*)}, \quad (7)$$

for any  $P$  with  $W_1(P, P^*) > \varepsilon$ . In this case, we choose  $\varepsilon \equiv \varepsilon_n$  to be as constant multiple of  $\{(dK/n) \log(Kn)\}^{1/2}$ .

Recall the two KL neighborhoods around  $(\pi^*, \mu^*)$  with radius  $(\varepsilon_\pi, \varepsilon_\mu)$  as

$$\mathcal{B}_n(\pi^*, \varepsilon_\pi) = \left\{ D(\pi^* || \pi) \leq \varepsilon_\pi^2, V(\pi^* || \pi) \leq \varepsilon_\pi^2 \right\},$$

$$\mathcal{B}_n(\mu^*, \varepsilon_\mu) = \left\{ \sup_s D[p(\cdot | \mu^*, s) || p(\cdot | \mu, s)] \leq \varepsilon_\mu^2, \right.$$

$$\left. \sup_s V[p(\cdot | \mu^*, s) || p(\cdot | \mu, s)] \leq \varepsilon_\mu^2 \right\},$$

where we used the shorthand  $D(\pi^* || \pi) = \sum_s \pi_s^* \log(\pi_s^*/\pi_s)$  to denote the KL divergence between multinomial distributions with parameters  $\pi^*, \pi \in \mathcal{S}_K$ . We choose  $q_\theta$  as the restriction of  $p_\theta$  into  $\mathcal{B}_n(\pi^*, \varepsilon_\pi) \times \mathcal{B}_n(\mu^*, \varepsilon_\mu)$ .

It is easy to verify that under Assumption **R**, there exists some constant  $C_1$  depending only on  $\delta_0$  such that  $\mathcal{B}_n(\pi^*, \sqrt{K}\varepsilon) \supset \{\pi : \max_k |\pi_k - \pi_k^*| \leq C_1 \varepsilon\}$  (by using the inequality  $D(p || q) \geq 2h^2(p || q)$ ). In addition, for Gaussian mixture model, it is easy to verify that the KL neighborhood  $\mathcal{B}_n(\mu^*, \varepsilon)$  contains the set  $\{\mu : \max_k \|\mu_k - \mu_k^*\| \leq 2\varepsilon\}$ . As a consequence, with  $\varepsilon_\pi = \sqrt{K}\varepsilon$  and  $\varepsilon_\mu = \varepsilon$  yields (using the prior thickness assumption and the fact that the volumes of  $\{\pi : \max_k |\pi_k - \pi_k^*| \leq C_1 \varepsilon\}$  and  $\{\mu : \max_k \|\mu_k - \mu_k^*\| \leq C_2 \varepsilon\}$  are at least  $\mathcal{O}(\varepsilon^{-K})$  and  $\mathcal{O}((\sqrt{d}/\varepsilon)^{dK})$  respectively). Then we have from Theorem 3.2, with probability tending to one as  $n \rightarrow \infty$ ,

$$\begin{aligned} \int \left\{ h^2 [f(\cdot | \theta) || f(\cdot | \theta^*)] \right\} \hat{q}_\theta(\theta) d\theta &\lesssim \frac{dK}{n} \log n + K \varepsilon^2 \\ &\quad + \frac{dK}{n} \log \frac{d}{\varepsilon}. \end{aligned}$$

Choosing  $\varepsilon = \sqrt{d/n}$  in the above display yields the claimed bound.

Also, we have with high probability

$$\int \left\{ W_1^2[f(\cdot|\theta) || f(\cdot|\theta^*)] \right\} \widehat{q}_\theta(\theta) d\theta \lesssim \frac{dK}{n} \log(Kn) + K\varepsilon^2 + \frac{dK}{n} \log \frac{d}{\varepsilon}.$$

Choosing  $\varepsilon = \sqrt{d/n}$  in the above display yields the claimed bound noting that the first term in the right hand side of the preceding display is dominant.

### 1.5 Proof of Theorem 4.1

Under the notation in the paper, for each  $n = 1, \dots, N$ , the latent variable  $S_n = \{z_{dn} : d = 1, \dots, D\}$ . We use Theorem 3.2 with  $d = h$  (Hellinger metric) and view each latent variable  $S_n$  per observation in the theorem as a block of  $D$  independent latent variable per observation. The existence of the test is automatic [3] with the Hellinger metric (parameter space is compact). This leads to that with probability tending to one as  $N \rightarrow \infty$ ,

$$\begin{aligned} \int \sum_{d=1}^D h^2 [p_d(\cdot|\theta) || p_d(\cdot|\theta^*)] d\theta &\leq \left( \sum_{d=1}^D \varepsilon_{\gamma_d}^2 + \sum_{k=1}^K \varepsilon_{\beta_k}^2 \right) \\ &+ \left\{ -\frac{1}{N} \sum_{d=1}^D \log P_{\gamma_d}[\mathcal{B}_N(\gamma_d^*, \varepsilon_{\gamma_d})] \right\} \\ &+ \left\{ -\frac{1}{N} \sum_{k=1}^K \log P_{\beta_k}[B_N(\beta_k^*, \varepsilon_{\beta_k})] \right\}, \end{aligned}$$

where KL neighborhoods  $\mathcal{B}_N(\gamma_d^*; \varepsilon_{\gamma_d}) := \{D(\gamma_d^* || \gamma_d) \leq \varepsilon_{\gamma_d}^2, V(\gamma_d^* || \gamma_d) \leq \varepsilon_{\gamma_d}^2\}$ , for  $d = 1, \dots, D$ , and  $B_N(\beta_k^*, \varepsilon_{\beta_k}) = \{\max_k D[p(\cdot|\beta_k, k) || p(\cdot|\beta_k, k)] \leq \varepsilon_{\beta_k}^2, \max_{S_n} V[p(\cdot|\beta_k, k) || p(\cdot|\beta_k, k)] \leq \varepsilon_{\beta_k}^2\}$ .

Let  $S_k^\beta$  denote the index set corresponding to the non-zero components of  $\beta_k$  for  $k = 1, \dots, K$ , and  $S_d^\gamma$  the index set corresponding to the non-zero components of  $\gamma_d$  for  $d = 1, \dots, D$ . Under Assumption **S**, it is easy to verify that for some sufficiently small constants  $c_1, c_2 > 0$ , it holds for all  $d = 1, \dots, D$  that  $\mathcal{B}_N(\gamma_d^*, \varepsilon_{\gamma_d}) \supset \{\|(\gamma_d)_{(S_d^\gamma)^c}\|_1 \leq c_1 \varepsilon_{\gamma_d}, \|(\gamma_d)_{S_d^\gamma} - (\gamma_d^*)_{S_d^\gamma}\|_\infty \leq c_1 \varepsilon_{\gamma_d}\}$ , and for all  $k = 1, \dots, K$  that  $\mathcal{B}_N(\beta_k^*, \varepsilon_{\beta_k}) \supset \{\|(\beta_k)_{(S_k^\beta)^c}\|_1 \leq c_2 \varepsilon_{\beta_k}, \|(\beta_k)_{S_k^\beta} - (\beta_k^*)_{S_k^\beta}\|_\infty \leq c_2 \varepsilon_{\beta_k}\}$ . Applying Theorem 2.1 in [4], we obtain the following prior concentration bounds for high-dimensional Dirichlet priors

$$\begin{aligned} P_{\gamma_d} \{ \|(\gamma_d)_{(S_d^\gamma)^c}\|_1 \leq c_1 \varepsilon_{\gamma_d}, \|(\gamma_d)_{S_d^\gamma} - (\gamma_d^*)_{S_d^\gamma}\|_\infty \leq c_1 \varepsilon_{\gamma_d} \} \\ \gtrsim \exp \left\{ -C e_d \log \frac{K}{\varepsilon_{\gamma_d}} \right\}, \quad d = 1, \dots, D; \end{aligned}$$

$$\begin{aligned} P_{\beta_k} \{ \|(\beta_k)_{(S_k^\beta)^c}\|_1 \leq c_2 \varepsilon_{\beta_k}, \|(\beta_k)_{S_k^\beta} - (\beta_k^*)_{S_k^\beta}\|_\infty \leq c_2 \varepsilon_{\beta_k} \} \\ \gtrsim \exp \left\{ -C d_k \log \frac{V}{\varepsilon_{\beta_k}} \right\}, \quad k = 1, \dots, K, \end{aligned}$$

for some constant  $C > 0$ .

Putting pieces together, we obtain

$$\begin{aligned} \int \sum_{d=1}^D h^2 [p_d(\cdot|\theta) || p_d(\cdot|\theta^*)] d\theta &\lesssim \left( \sum_{d=1}^D \varepsilon_{\gamma_d}^2 + \sum_{k=1}^K \varepsilon_{\beta_k}^2 \right) \\ &+ \frac{1}{N} \sum_{d=1}^D e_d \log \frac{K}{\varepsilon_{\gamma_d}} + \frac{1}{N} \sum_{k=1}^K d_k \log \frac{V}{\varepsilon_{\beta_k}}, \end{aligned}$$

which leads to the desired bound by optimally choosing  $\varepsilon_{\gamma_d}$ 's and  $\varepsilon_{\beta_k}$ 's.

## References

- [1] Stéphane Boucheron, Gábor Lugosi, and Pascal Massart. *Concentration inequalities: A nonasymptotic theory of independence*. Oxford university press, 2013.
- [2] Subhashis Ghosal and Aad W van der Vaart. Entropies and rates of convergence for maximum likelihood and bayes estimation for mixtures of normal densities. *Annals of Statistics*, pages 1233–1263, 2001.
- [3] Lucien LeCam. Convergence of estimates under dimensionality restrictions. *The Annals of Statistics*, pages 38–53, 1973.
- [4] Yun Yang and David B Dunson. Minimax optimal Bayesian aggregation. *arXiv preprint arXiv:1403.1345*, 2014.
